# Supplementary material for: Engineered fusion protein-loaded gold nanocarriers for targeted co-delivery of doxorubicin and erbB2-siRNA in human epidermal growth factor receptor-2+ ovarian cancer
Source: Royal Society of Chemistry journal article supplement (doi:10.1039/c7tb01587a), 2017-01-01
Supplement: c7tb01587a1.pdf [file c7tb01587a1.pdf]

## Supplementary Information

### Engineered fusion protein-loaded gold nanocarriers for targeted co-delivery of doxorubicin and erbB2 siRNA in human epidermal growth factor receptor-2 expressing ovarian cancer

Rajesh Kotcherlakota<sup>a,c</sup>, Durga Jeyalakshmi Srinivasan<sup>b#</sup>, Sudip Mukherjee<sup>a,c#</sup>, Mohamed Mohamed Haroon<sup>b</sup>, Ghulam Hassan Dar<sup>b</sup>, Uthra Venkatraman<sup>b</sup>, Chitta Ranjan Patra<sup>\*a,c</sup>, Vijaya Gopal<sup>b\*</sup>

<sup>a</sup> Department of Chemical Biology, CSIR-Indian Institute of Chemical Technology, Uppal Road, Tarnaka, Hyderabad - 500007, Telangana, India

<sup>b</sup> CSIR-Centre for Cellular and Molecular Biology, Uppal Road, Hyderabad 500007 Telangana, India

<sup>c</sup> Academy of Scientific and Innovative Research (AcSIR), Training and Development Complex, CSIR Campus, CSIR Road, Taramani, Chennai – 600 113, India

#### **\*To whom correspondence should be addressed**

#### **Dr. ChittaRanjanPatra, Ph. D**

Department of Chemical Biology,

CSIR-Indian Institute of Chemical Technology (CSIR-IICT)

Uppal Road, Tarnaka, Hyderabad - 500007, Telangana, India

Tel: ++91-40-27191480 (O)

Fax: +91-40-27160387

**E-mail:** crpatra@iict.res.in ; patra.chitta@gmail.com

#### **Dr. Vijaya Gopal, Ph. D**

CSIR-Centre for Cellular and Molecular Biology (CSIR-CCMB)

Uppal Road, Tarnaka, Hyderabad - 500007, Telangana, India.

Tel.: +91 40 27192545; fax: +91 40 27160310.

**E-mail:** vijaya@ccmb.res.in; vg562000@gmail.com

<sup>\*</sup>contributed equally.

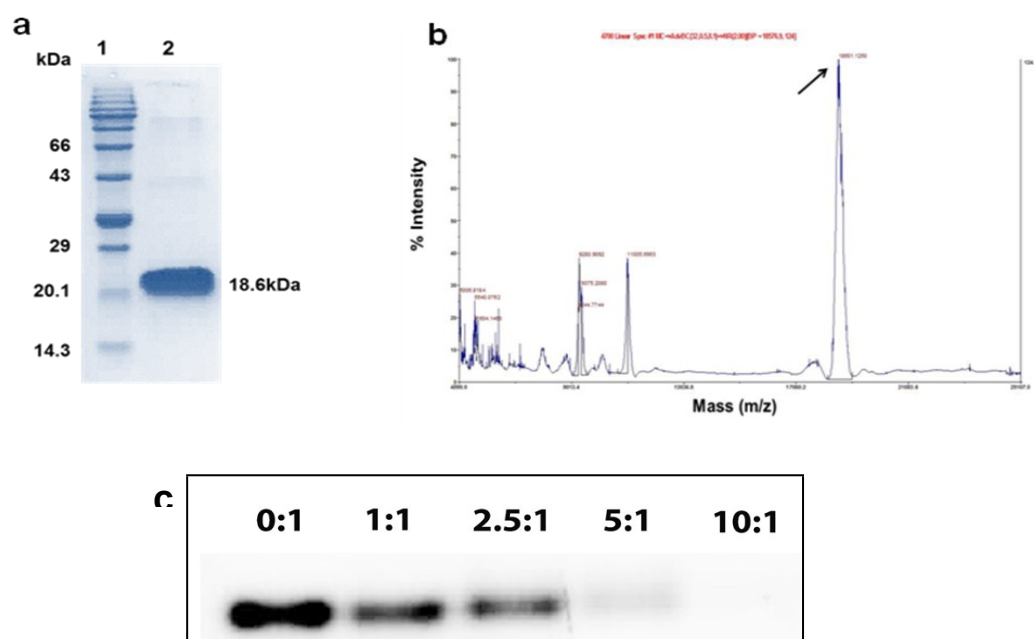

**Figure S1:** a) 12% SDS-PAGE analysis of purified TRAF(C) fusion protein as described in materials and methods. Lane 1: Molecular weight marker, Lane 2: Purified TRAF(C) fraction b) MALDI-TOF analysis of the purified TRAF(C) fusion protein of molecular weight 18.6 kDa. c) Gel binding assay of TRAF(C) protein with siRNA. Different mole ratios of TRAF(C) protein was used by keeping siRNA ratio constant.

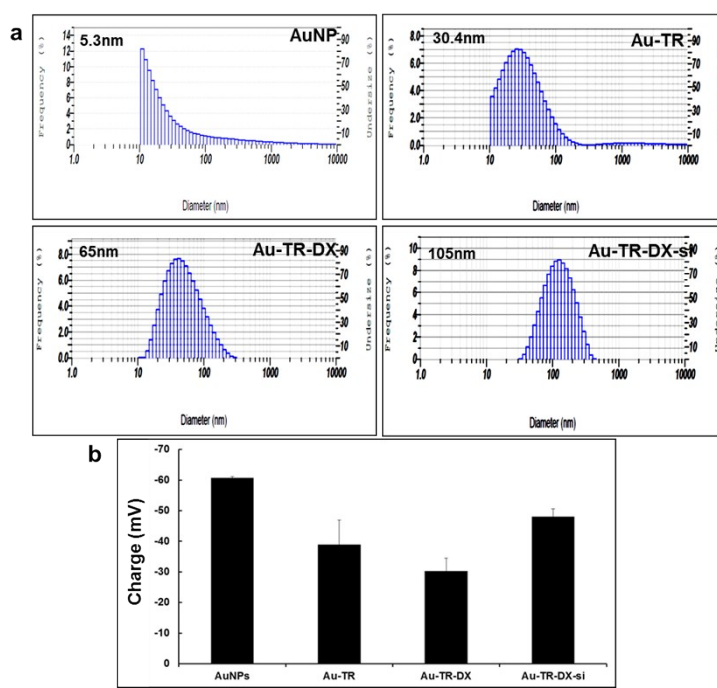

**Figure S2:** a) Determination of hydrodynamic diameter by dynamic light scattering of indicated formulations AuNPs, AuNPs with TR, DX and siRNA. The figure shows the gradual increase in the size of nanoparticles with the addition of respective biomolecules b) Determination of surface charge of AuNPs, AuNPs with TR, DX and siRNA formulations.

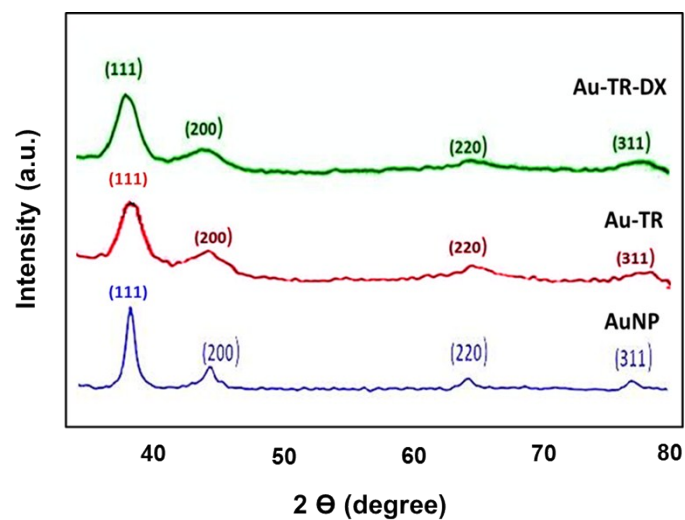

**Figure S3.** Determination of surface crystallinity of gold nanocomplex by X-Ray Diffraction analysis. Similarity in XRD patterns of Au-TR, Au-TR-DX and AuNP indicates that the surface crystallinity of AuNP is unchanged upon conjugation with TR and DX.

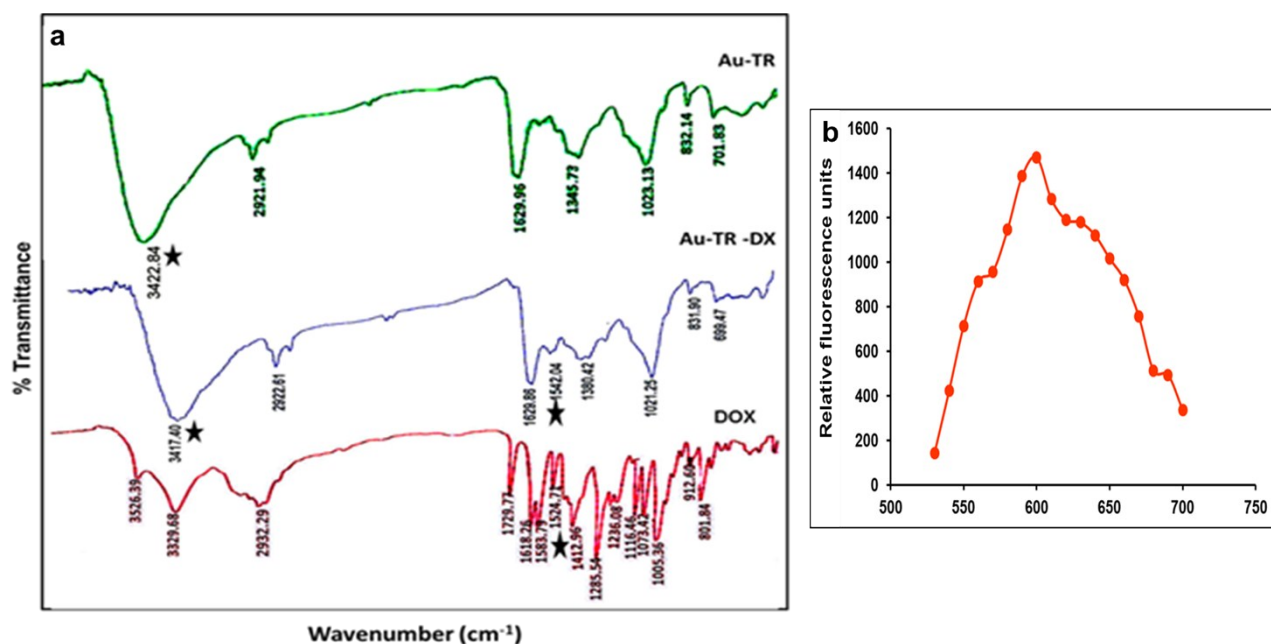

**Figure S4. (a) Fourier transform infrared spectroscopy (FTIR).** Functional group analysis of doxorubicin alone, Au-TR and Au-TR-DX formulations. Free doxorubicin shows a peak at  $1524\text{ cm}^{-1}$  which is shifted to  $1542\text{ cm}^{-1}$  in Au-TR-DX which indicates the possible weak covalent bonding between  $\text{Au-NH}_2$ . Another peak in Au-TR at  $3422\text{ cm}^{-1}$  shifted to lower frequency ( $3417\text{ cm}^{-1}$ ) for Au-TR-DX indicating possible dative bonding ( $\text{Au-OH}$ ) between  $-\text{OH}$  group of doxorubicin and gold nanosurface. (b) The graph depicts the fluorescence peak of doxorubicin originating from Au-TR-DX-si pellet.

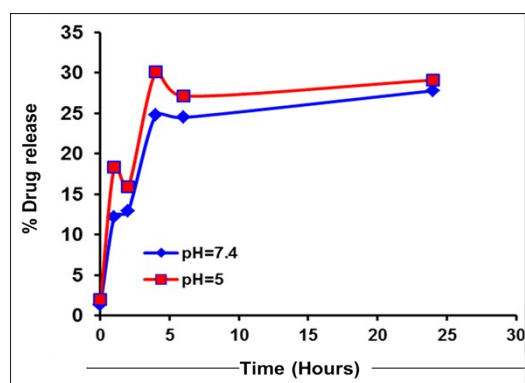

**Figure S5. Spectroscopic evaluation of release of doxorubicin from Au-TR-DX-si complex.** Graph depicts sustained time-dependent release of doxorubicin from Au-TR-DX-si complex at pH 5.0 and pH 7.4

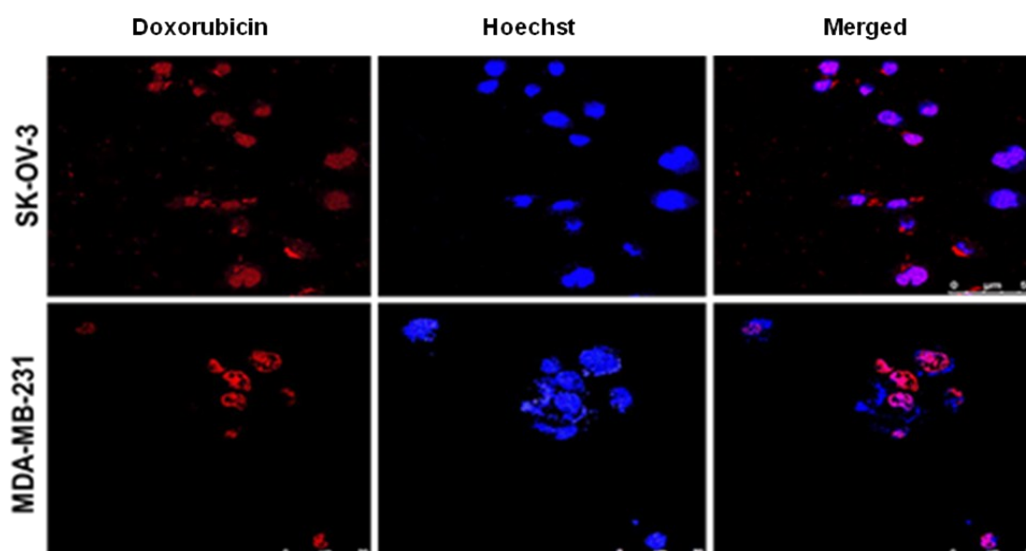

**Figure S6.** Comparative analysis of doxorubicin uptake in MDA-MB-231 and SK-OV-3 cells by confocal microscopy.

Nonspecific uptake of doxorubicin is evidenced by strong red fluorescence in the nuclei stained with Hoechst-33258 (Blue).

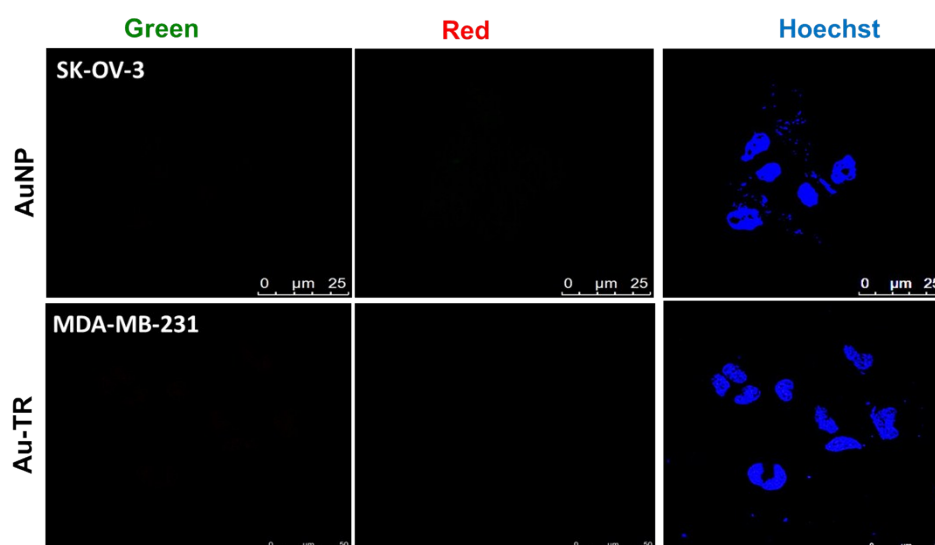

**Figure S7.** Confocal microscopy analysis of cell uptake of Au-TR and free AuNP in MDA-MB-231 and SK-OV-3 cells. The

cells do not show any fluorescence from either Au-TR or free AuNPs uptake in this control experiment.

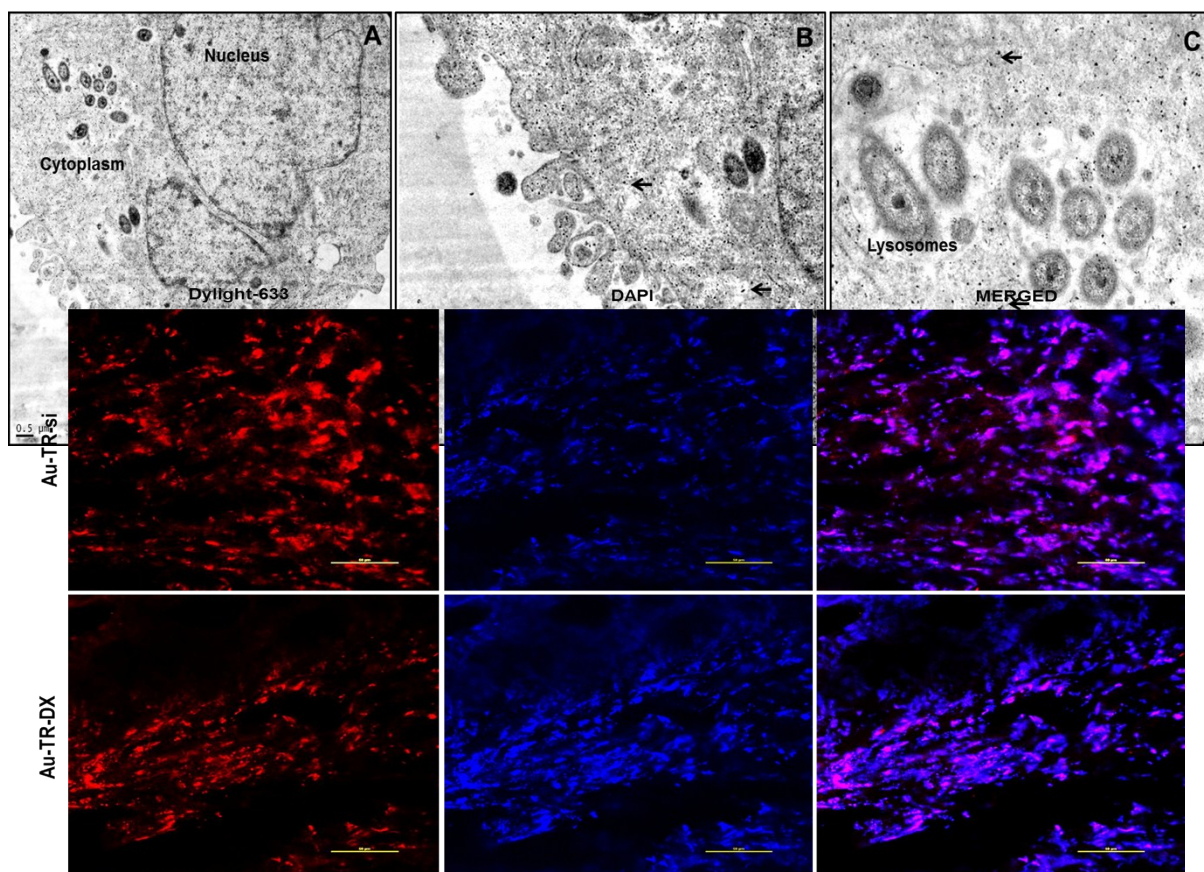

**Figure S8. Internalization of TDDS in SK-OV-3 cells by TEM.** TEM images depict spherical AuNPs. Panel A represents cells treated with TDDS. Panels B and C are the portions of magnified image of A to represent the cytoplasmic distribution of AuNPs as black dots.

**Figure S9. Immunostaining of Au-TR-si and Au-TR-DX treated SK-OV-3 tumor sections by confocal microscopy using Ki-67 antibodies.** The image represents tumor sections treated with Au-TR-si and Au-TR-DX treated SK-OV-3 tumor sections respectively following immunostaining.

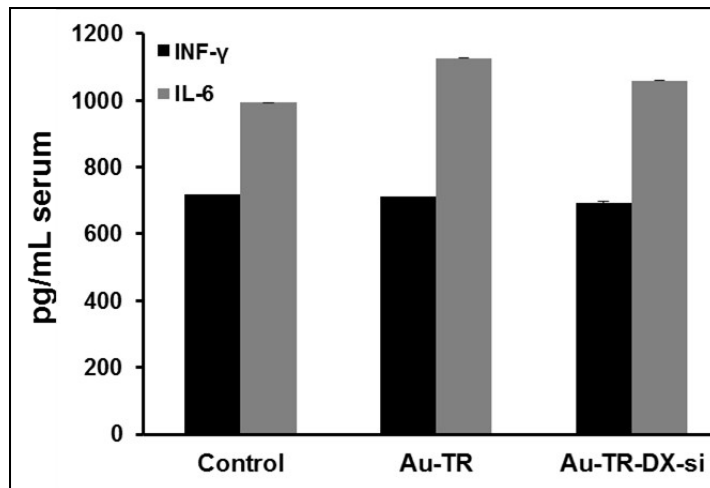

**Figure S10. Determination of serum cytokine levels by ELISA.** C57/BL/6 mice were treated with Au-TR and TDDS and compared with untreated groups. Graph depicts measurement of INF- $\gamma$  and IL-6 levels in serum, following intraperitoneal injection. No significant change in INF- $\gamma$  and IL-6 levels confirm the non-immunogenic nature of the complex.
